# Supplementary material
Source: PubMed Central journal article supplement (PMC3447109)
Supplement: NIHMS380857-supplement-01.pdf [file NIHMS380857-supplement-01.pdf]

Beyond the cellular uptake: Limitations of cell imaging in predicting bioactivity of nanoparticles

Emily Gullotti<sup>1</sup> and Yoon Yeo<sup>1,2,\*</sup>

### Supporting Figures

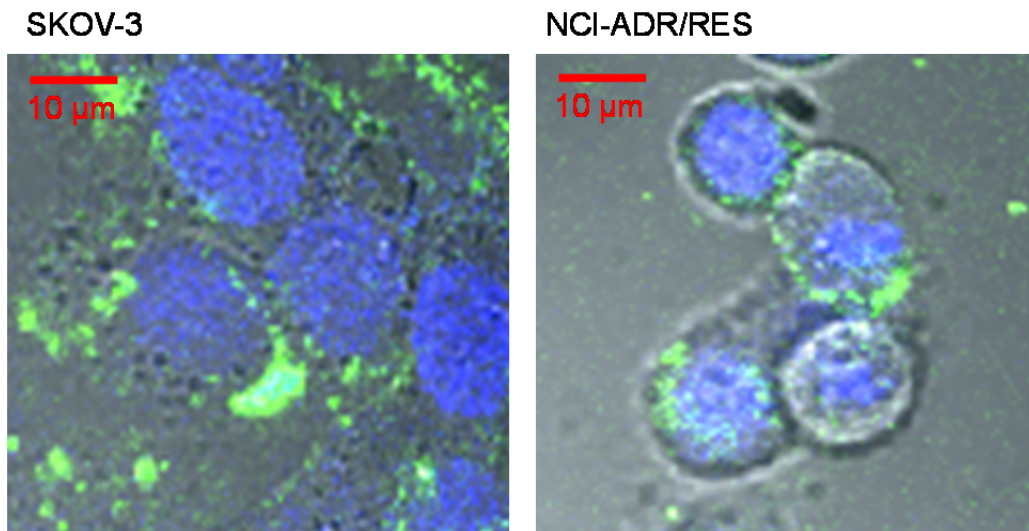

**Supporting Fig. 1.** Close-up images of SKOV-3 cells and NCI/ADR-RES cells incubated with fluorescently labeled PLGA\*-TAT NPs for 3 hours. NP: green fluorescence signal from NPs; Nu: nuclei stained with Draq5; Tm: transmission image; Overlay: overlay of NP, Nu and Tm. Scale bar: 10 µm.

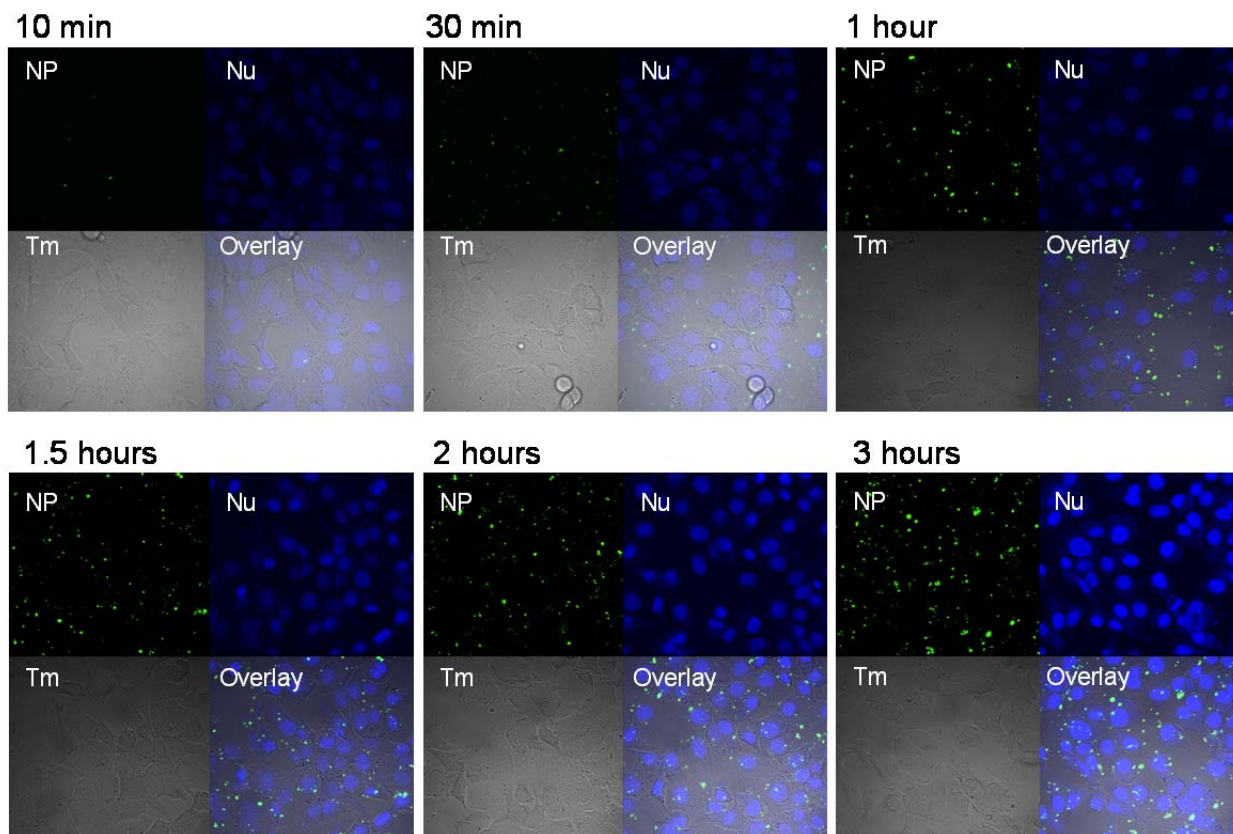

**Supporting Fig 2.** SKOV-3 cells incubated with PLGA\*-TAT NPs for 10 minutes, 30 minutes, 1 hr, 1.5 hrs, 2 hrs, or 3 hrs. The NP size and zeta potential for the 10 and 30 minute NPs were 291 nm and -27 mV (at pH 7.4), respectively. The NP size and zeta potential for the 1, 1.5, 2 and 3 hr NPs were 365 nm and -7 mV (at pH 7.4), respectively. NP fluorescence increased with the incubation time. NP: green fluorescence signal from NPs; Nu: nuclei stained with Draq5; Tm: transmission image; Overlay: overlay of NP, Nu and Tm.
